# Supplementary material for: Full-length transcriptome analysis revealed that 2,4-dichlorophenoxyacetic acid promoted in vitro bulblet initiation in lily by affecting carbohydrate metabolism and auxin signaling
Source: Front Plant Sci. 2023 Sep 20;14:1236315. doi: 10.3389/fpls.2023.1236315 (PMC10548195; doi:10.3389/fpls.2023.1236315)
Supplement: Supplementary Table 1 — Statistical summary of the reference transcriptome. [file Table_1.xlsx]

## Sheet: Table S1
Supplementary Table S1. Statistical summary of the reference transcriptome.
Species	Sequencing platform	No. of clean data (Gb)	No. of transcripts	Total GC content	Mean length (bp)	N50	Total predicted CDS	Sequence completeness (%)
Lilium brownii	Pacbio RS II	25.69	65050	0.4674	2965	5199	54496	0.731
Lilium brownii var. giganteum	Pacbio RS II	17.69	53676	0.4662	3108	5422	46647	0.759
Species	Sequencing platform	No. of clean reads	No. of transcripts	Mapping rate to the full length transcriptome (%)
Lilium brownii	Ilumina HiSeq	68065890	58242	0.8185
Lilium brownii var. giganteum	Ilumina HiSeq	64992578	49390	0.8079
