# Supplementary material for: Full-length transcriptome analysis revealed that 2,4-dichlorophenoxyacetic acid promoted in vitro bulblet initiation in lily by affecting carbohydrate metabolism and auxin signaling
Source: Front Plant Sci. 2023 Sep 20;14:1236315. doi: 10.3389/fpls.2023.1236315 (PMC10548195; doi:10.3389/fpls.2023.1236315)
Supplement: Supplementary Table 2 — Primers of selected transcripts for quantitative real-time PCR validation. [file Table_2.xlsx]

## Sheet: Table S2
Supplementary Table S2. Primers of selected transcripts for quantitative real-time PCR validation.
Species	Transcript ID	Forward primer	Reverse primer
Lbg	Isoform_22016	TCAGGGAATGCTTCAACCCC	CACAGTCAGCTCCTCCACTG
Lbg	Isoform_21863	CTCGCCGAGTATGAAGCAGT	CGCTCCCATCCACAAGTTCT
Lbg	Isoform_28761	TTCAGCCGCCTAAGAACTGG	GTTCGGGTCGATGCCTGTAT
Lbg	Isoform_48633	CGTCTCCGCCTTCATACTCC	TATTCTCATCCGTCAGCGCC
Lbg	Isoform_29525	TCCGACTCGAAAAACTCGCA	AGGTGGCGATTAAGTGAGGC
Lbg	Isoform_20315	TGCCGATGTCTTCTTCTCCG	GAGCCAGGGGGTCTCATTTC
Lb	Isoform_31916	TCACTGGATTCCACATGGGC	CACTTCTTCGCAGGTCCCTT
Lb	Isoform_25438	CTCGCCGAGTATGAAGCAGT	CGCTCCCATCCACAAGTTCT
Lb	Isoform_39080	ATACTGCCAAGGGTTGGTCG	AGCCTGTGCAGAACTGATCC
Lb	Isoform_36307	CCGAGCTCCGCTCATAGTTT	TAGTTCGCTCCCAACGGAAC
Lb	Isoform_34089	GGCCAGCAAGAGTGTTTTGG	CCATGTTGCTCGCATAAGCC
Lb	Isoform_27602	CTGGGAAGTCCTTCGGTTCC	ACATCTTCAGCGACAACCGT
Lbg&Lb	reference gene (GAPDH)	TCTCTGCCCCTAGCAAGGAT	TGAGTAGCAGTGATGGCGTG
